# Supplementary material for: Ultrasensitive Na+ exchanging performance of free-standing Fe3O4@Na2Ti3O7 nanosheets indicated by fluorescein
Source: Royal Society of Chemistry journal article supplement (doi:10.1039/b921304j), 2010-01-01
Supplement: b921304j.pdf [file b921304j.pdf]

## Supplementary Information

### Ultrasensitive Na<sup>+</sup> exchanging performance of free-standing Fe<sub>3</sub>O<sub>4</sub>@Na<sub>2</sub>Ti<sub>3</sub>O<sub>7</sub> nanosheets indicated by fluorescein†

Xuebo Cao,<sup>a,\*</sup> Xiudong Xue,<sup>a</sup> Lianwen Zhu,<sup>a</sup> Peng Chen,<sup>a</sup> Yingying Song<sup>a</sup> and Meng Chen<sup>b,\*</sup>

<sup>a</sup>Key Lab of Organic Synthesis of Jiangsu Province and Department of Chemistry, Soochow University, Suzhou, Jiangsu 215123, P. R. China. Fax: 86-512-65880089; Tel: 86-512-65880019;

E-mail: [xbcao@suda.edu.cn](mailto:xbcao@suda.edu.cn)

<sup>b</sup>Department of Chemistry, Fudan University  
Shanghai 200433 (P. R. China)

E-mail: [chenmeng@fudan.edu.cn](mailto:chenmeng@fudan.edu.cn)

**Table S1.** Experimental conditions, chemical compositions, and morphologies for various samples involved in the studies

| starting Materials                                                                     | reaction | reaction | Chemical Compositions                                                           | Fe : Ti : Na       | morphology          |
|----------------------------------------------------------------------------------------|----------|----------|---------------------------------------------------------------------------------|--------------------|---------------------|
|                                                                                        | T (°C)   | t (h)    |                                                                                 | (molar ratio, ICP) |                     |
| TiO <sub>2</sub> (0.07 g) + Fe (0.015-0.02 g) + NaOH (10 g) + H <sub>2</sub> O (25 mL) | 160      | 48       | Fe <sub>3</sub> O <sub>4</sub> + Na <sub>2</sub> Ti <sub>3</sub> O <sub>7</sub> | 1 : 3.2 : 2.1      | Nanosheets          |
| TiO <sub>2</sub> (0.07 g) + NaOH (10 g) + H <sub>2</sub> O (25 mL)                     | 160      | 48       | Na <sub>2</sub> Ti <sub>3</sub> O <sub>7</sub>                                  | --                 | Nanotubes           |
| TiO <sub>2</sub> (0.07 g) + NaOH (10 g) + H <sub>2</sub> O (25 mL)                     | 180      | 48       | Na <sub>2</sub> Ti <sub>3</sub> O <sub>7</sub>                                  | --                 | Nanobelts           |
| Fe (0.015-0.02 g) + NaOH (10 g) + H <sub>2</sub> O (25 mL)                             | 160      | 48       | Fe <sub>3</sub> O <sub>4</sub>                                                  | --                 | Irregular particles |

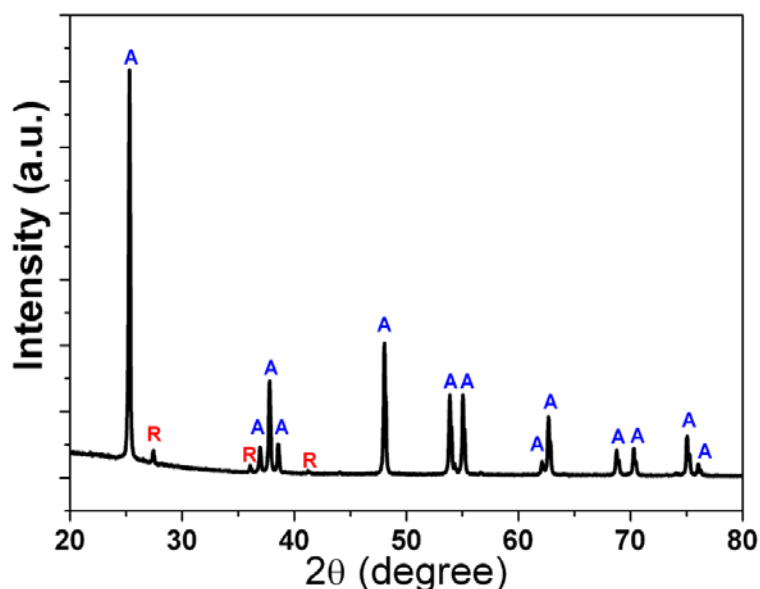

**Figure S1.** XRD pattern of the TiO<sub>2</sub> used in the synthesis, where A and R denote anatase and rutile,

respectively.

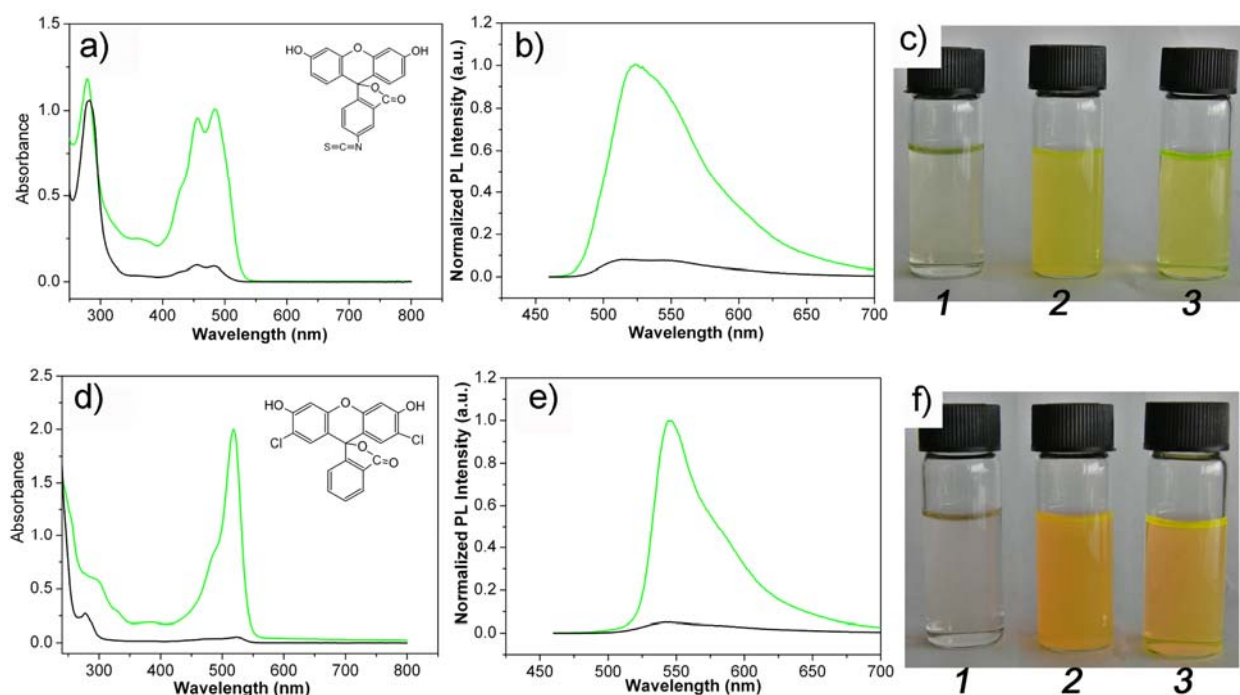

**Figure S2.** This figure shows the interactions of  $\text{Fe}_3\text{O}_4@\text{Na}_2\text{Ti}_3\text{O}_7$  nanosheets with FITC (top) and FDC (bottom). a, d) UV-vis absorption spectra of solution **1** (black line) and **3** (green line). Insets: Structural formula of FITC and FDC. b, e) Normalized PL spectra of solution **1** (black line) and **3** (green line). Excitation wavelength: 450 nm. c, f) Photographs of the initial solution (**1**), the solution after adding  $\text{Fe}_3\text{O}_4@\text{Na}_2\text{Ti}_3\text{O}_7$  nanosheets (**2**), and the solution after separating the nanosheets (**3**). The significant enhancement of absorbance and fluorescence in these FL derivatives share a same mechanism as the description in FL.

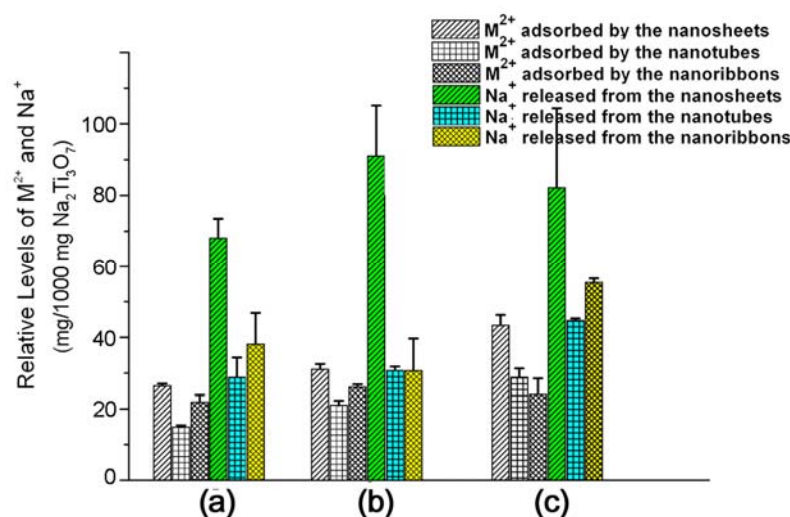

**Figure S3.** Ions exchange between interlayer Na<sup>+</sup> in various Na<sub>2</sub>Ti<sub>3</sub>O<sub>7</sub> nanostructures and heavy metal ions M<sup>2+</sup>. A: M = Cd; B: M = Cu; C: M = Pb. In all cases, Fe<sub>3</sub>O<sub>4</sub>@Na<sub>2</sub>Ti<sub>3</sub>O<sub>7</sub> nanosheets showed the highest releasing level of Na<sup>+</sup> and adsorption level of M<sup>2+</sup>.

The ion exchange experiments were conducted as follows: firstly, 25 mL of aqueous solution of M<sup>2+</sup> (M=Cd, Cu, or Pb) with a concentration of 1.0 mmol/L were prepared. Then, 10 mg of Fe<sub>3</sub>O<sub>4</sub>@Na<sub>2</sub>Ti<sub>3</sub>O<sub>7</sub> nanosheets or Na<sub>2</sub>Ti<sub>3</sub>O<sub>7</sub> nanotubes or Na<sub>2</sub>Ti<sub>3</sub>O<sub>7</sub> nanoribbons was dispersed in the respective solutions and stirred for 24 h for sufficient exchange between interlayer Na<sup>+</sup> in titanates nanostructures and M<sup>2+</sup> in the solution. After that, solids were separated from the solution by centrifugation at a rate of 2000 rpm and washed four times with deionized water. Both the solids and the supernatants containing Na<sup>+</sup> released by titanates were collected. Na<sup>+</sup> in the supernatants was directly analyzed by ICP-AES. To determine the amounts of M<sup>2+</sup> fixed by various titanate nanostructures, the collected solids were dissolved by concentrated HNO<sub>3</sub>. The resulting solutions were then analyzed by ICP-AES.

**Table S2.** The adsorption ability of per gram titanate nanostructures towards  $\text{Cd}^{2+}$ ,  $\text{Cu}^{2+}$ , and  $\text{Pb}^{2+}$

|                                                                     | $\text{Cd}^{2+}$ (mg) | $\text{Cu}^{2+}$ (mg) | $\text{Pb}^{2+}$ (mg) |
|---------------------------------------------------------------------|-----------------------|-----------------------|-----------------------|
| $\text{Fe}_3\text{O}_4@\text{Na}_2\text{Ti}_3\text{O}_7$ nanosheets | 26.2                  | 30.4                  | 40.5                  |
| $\text{Na}_2\text{Ti}_3\text{O}_7$ nanotubes                        | 14.7                  | 20.2                  | 30.6                  |
| $\text{Na}_2\text{Ti}_3\text{O}_7$ nanoribbons                      | 21.3                  | 25.4                  | 23.8                  |

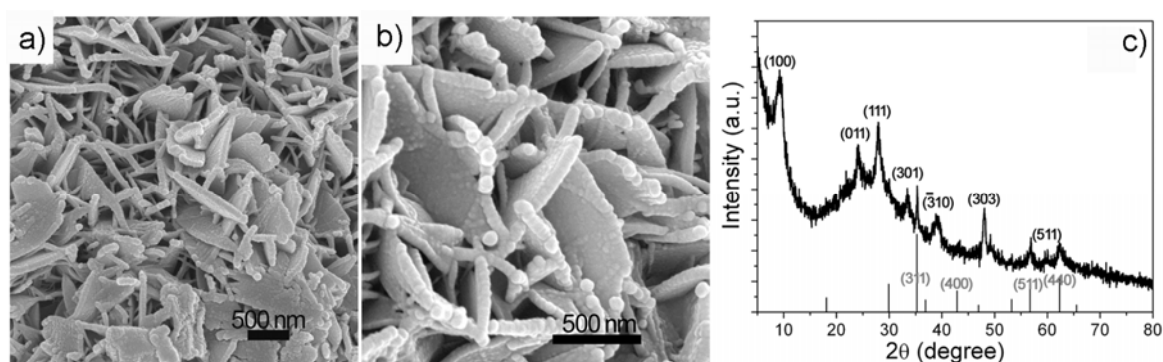

**Figure S4.** a, b) SEM images and c) XRD pattern of  $\text{Fe}_3\text{O}_4@\text{Na}_2\text{Ti}_3\text{O}_7$  nanosheets after interactions with FL four times. The nanosheets still maintained their morphology and structure well, suggesting that they were quite stable.
